1 **The effect of sample size on polygenic hazard models for prostate cancer**

2

3 Roshan A. Karunamuni<sup>1</sup>, Minh-Phuong Huynh-Le<sup>1</sup>, Chun C. Fan<sup>2</sup>, Rosalind A.  
4 Eeles<sup>3,4</sup>, Douglas F. Easton<sup>5</sup>, ZSofia Kote-Jarai<sup>3</sup>, Ali Amin Al Olama<sup>5,6</sup>, Sara  
5 Benlloch Garcia<sup>5</sup>, Kenneth Muir<sup>7,8</sup>, Henrik Gronberg<sup>9</sup>, Fredrik Wiklund<sup>9</sup>, Markus  
6 Aly<sup>9,10,11</sup>, Johanna Schleutker<sup>12,13</sup>, Csilla Sipeky<sup>12</sup>, Teuvo LJ Tammela<sup>14,15</sup>, Børge  
7 G. Nordestgaard<sup>16,17</sup>, Tim J. Key<sup>18</sup>, Ruth C. Travis<sup>18</sup>, David E. Neal<sup>19,20,21</sup>, Jenny  
8 L. Donovan<sup>22</sup>, Freddie C. Hamdy<sup>23,24</sup>, Paul Pharoah<sup>25</sup>, Nora Pashayan<sup>26,25,27</sup>,  
9 Kay-Tee Khaw<sup>28</sup>, Stephen N. Thibodeau<sup>29</sup>, Shannon K. McDonnell<sup>30</sup>, Daniel J.  
10 Schaid<sup>30</sup>, Christiane Maier<sup>31</sup>, Walther Vogel<sup>32</sup>, Manuel Luedeke<sup>31</sup>, Kathleen  
11 Herkommer<sup>33</sup>, Adam S. Kibel<sup>34</sup>, Cezary Cybulski<sup>35</sup>, Dominika Wokolorczyk<sup>35</sup>,  
12 Wojciech Kluzniak<sup>35</sup>, Lisa Cannon-Albright<sup>36,37</sup>, Hermann Brenner<sup>38,39,40</sup>, Ben  
13 Schöttker<sup>41,42</sup>, Bernd Holleczeck<sup>43,44</sup>, Jong Y. Park<sup>45</sup>, Thomas A. Sellers<sup>45</sup>, Hui-Yi  
14 Lin<sup>46</sup>, Chavdar Slavov<sup>47</sup>, Radka Kaneva<sup>48</sup>, Vanio Mitev<sup>48</sup>, Jyotsna Batra<sup>49,50</sup>,  
15 Judith A. Clements<sup>51,52</sup>, Amanda Spurdle<sup>53</sup>, Australian Prostate Cancer  
16 BioResource (APCB)<sup>51</sup>, Manuel R. Teixeira<sup>54,55</sup>, Paula Paulo<sup>54,56</sup>, Sofia Maia<sup>54,56</sup>,  
17 Hardev Pandha<sup>57</sup>, Agnieszka Michael<sup>57</sup>, Ian G. Mills<sup>58,59</sup>, Ole A. Andreassen<sup>60</sup>,  
18 Anders M. Dale<sup>61,62,63</sup>, Tyler M. Seibert<sup>1</sup>, The PRACTICAL Consortium<sup>^</sup>

19 <sup>1</sup>Department of Radiation Medicine and Applied Sciences, University of California  
20 San Diego, La Jolla, CA, USA

21 <sup>2</sup>Healthlytix, 4747 Executive Dr. Suite 820, San Diego, CA, USA

22 <sup>3</sup>The Institute of Cancer Research, London, SM2 5NG, UK

23 <sup>4</sup>Royal Marsden NHS Foundation Trust, London, SW3 6JJ, UK

24 <sup>5</sup>Centre for Cancer Genetic Epidemiology, Department of Public Health and  
25 Primary Care, University of Cambridge, Strangeways Research Laboratory,  
26 Cambridge CB1 8RN, UK

27 <sup>6</sup>University of Cambridge, Department of Clinical Neurosciences, Stroke  
28 Research Group, R3, Box 83, Cambridge Biomedical Campus, Cambridge CB2

29 0QQ, UK

30 <sup>7</sup>Division of Population Health, Health Services Research and Primary Care,  
31 University of Manchester, Oxford Road, Manchester, M13 9PL, UK

32 <sup>8</sup>Warwick Medical School, University of Warwick, Coventry, UK

33 <sup>9</sup>Department of Medical Epidemiology and Biostatistics, Karolinska Institute, SE-  
34 171 77 Stockholm, Sweden

35 <sup>10</sup>Department of Molecular Medicine and Surgery, Karolinska Institute, SE-171  
36 77 Stockholm, Sweden

37 <sup>11</sup>Department of Urology, Karolinska University Hospital, Stockholm, Sweden

38 <sup>12</sup>Institute of Biomedicine, Kiinamyllynkatu 10, FI-20014 University of Turku,  
39 Finland

40 <sup>13</sup>Department of Medical Genetics, Genomics, Laboratory Division, Turku  
41 University Hospital, PO Box 52, 20521 Turku, Finland

42 <sup>14</sup>Faculty of Medicine and Health Technology, Prostate Cancer Research Center,  
43 FI-33014 Tampere University, Finland

44 <sup>15</sup>Department of Urology, Tampere University Hospital, Tampere, Finland

45 <sup>16</sup>Faculty of Health and Medical Sciences, University of Copenhagen, 2200  
46 Copenhagen, Denmark

47 <sup>17</sup>Department of Clinical Biochemistry, Herlev and Gentofte Hospital,  
48 Copenhagen University Hospital, Herlev, 2200 Copenhagen, Denmark

49 <sup>18</sup>Cancer Epidemiology Unit, Nuffield Department of Population Health, University  
50 of Oxford, Oxford, OX3 7LF, UK

51 <sup>19</sup>Nuffield Department of Surgical Sciences, University of Oxford, Room 6603,  
52 Level 6, John Radcliffe Hospital, Headley Way, Headington, Oxford, OX3 9DU,  
53 UK

54 <sup>20</sup>University of Cambridge, Department of Oncology, Box 279, Addenbrooke's  
55 Hospital, Hills Road, Cambridge CB2 0QQ, UK

56 <sup>21</sup>Cancer Research UK, Cambridge Research Institute, Li Ka Shing Centre,  
57 Cambridge UK

58 <sup>22</sup>School of Social and Community Medicine, University of Bristol, Canynge Hall,  
59 39 Whatley Road, Bristol, BS8 2PS, UK

60 <sup>23</sup>Nuffield Department of Surgical Sciences, University of Oxford, Oxford, OX1  
61 2JD, UK

62 <sup>24</sup>Faculty of Medical Science, University of Oxford, John Radcliffe Hospital,  
63 Oxford, UK

64 <sup>25</sup>Centre for Cancer Genetic Epidemiology, Department of Oncology, University  
65 of Cambridge, Strangeways Laboratory, Worts Causeway, Cambridge, CB1  
66 8RN, UK

67 <sup>26</sup>University College London, Department of Applied Health Research,  
68 London, UK

69 <sup>27</sup>Department of Applied Health Research, University College London, London,  
70 WC1E 7HB, UK

71 <sup>28</sup>Clinical Gerontology Unit, University of Cambridge, Cambridge, CB2 2QQ, UK

72 <sup>29</sup>Department of Laboratory Medicine and Pathology, Mayo Clinic, Rochester,  
73 MN 55905, USA

74 <sup>30</sup>Division of Biomedical Statistics & Informatics, Mayo Clinic, Rochester, MN

- 75 55905, USA
- 76 <sup>31</sup>Humangenetik Tuebingen, Paul-Ehrlich-Str 23, D-72076 Tuebingen
- 77 <sup>32</sup>Institute for Human Genetics, University Hospital Ulm, 89075 Ulm, Germany
- 78 <sup>33</sup>Technical University of Munich, School of Medicine, Klinikum rechts der Isar,
- 79 Department of Urology
- 80 <sup>34</sup>Division of Urologic Surgery, Brigham and Womens Hospital, 75 Francis Street,
- 81 Boston, MA 02115, USA
- 82 <sup>35</sup>International Hereditary Cancer Center, Department of Genetics and Pathology,
- 83 Pomeranian Medical University, 70-115 Szczecin, Poland
- 84 <sup>36</sup>Division of Genetic Epidemiology, Department of Medicine, University of Utah
- 85 School of Medicine, Salt Lake City, Utah 84112, USA
- 86 <sup>37</sup>George E. Wahlen Department of Veterans Affairs Medical Center, Salt Lake
- 87 City, Utah 84148, USA
- 88 <sup>38</sup>Division of Clinical Epidemiology and Aging Research, German Cancer
- 89 Research Center (DKFZ), D-69120, Heidelberg, Germany
- 90 <sup>39</sup>German Cancer Consortium (DKTK), German Cancer Research Center
- 91 (DKFZ), D-69120 Heidelberg, Germany
- 92 <sup>40</sup>Division of Preventive Oncology, German Cancer Research Center (DKFZ) and
- 93 National Center for Tumor Diseases (NCT), Im Neuenheimer Feld 460
- 94 69120 Heidelberg, Germany
- 95 <sup>41</sup>Division of Clinical Epidemiology and Aging Research, German Cancer
- 96 Research Center (DKFZ), D-69120 Heidelberg, Germany
- 97 <sup>42</sup>Network Aging Research, University of Heidelberg, Heidelberg, Germany
- 98 <sup>43</sup>Saarland Cancer Registry, D-66119 Saarbrücken, Germany
- 99 <sup>44</sup>Division of Clinical Epidemiology and Aging Research, German Cancer
- 100 Research Center (DKFZ), Heidelberg, Germany
- 101 <sup>45</sup>Department of Cancer Epidemiology, Moffitt Cancer Center, 12902 Magnolia
- 102 Drive, Tampa, FL 33612, USA
- 103 <sup>46</sup>School of Public Health, Louisiana State University Health Sciences Center,
- 104 New Orleans, LA 70112, USA
- 105 <sup>47</sup>Department of Urology and Alexandrovska University Hospital, Medical
- 106 University of Sofia, 1431 Sofia, Bulgaria
- 107 <sup>48</sup>Molecular Medicine Center, Department of Medical Chemistry and
- 108 Biochemistry, Medical University of Sofia, Sofia, 2 Zdrave Str., 1431 Sofia,
- 109 Bulgaria
- 110 <sup>49</sup>Institute of Health and Biomedical Innovation and School of Biomedical
- 111 Sciences, Queensland University of Technology, Brisbane, QLD 4059, Australia
- 112 <sup>50</sup>Australian Prostate Cancer Research Centre-Qld, Translational Research
- 113 Institute, Brisbane, Queensland 4102, Australia
- 114 <sup>51</sup>Australian Prostate Cancer Research Centre-Qld, Institute of Health and
- 115 Biomedical Innovation and School of Biomedical Science, Queensland University
- 116 of Technology, Brisbane QLD 4059, Australia
- 117 <sup>52</sup>Translational Research Institute, Brisbane, Queensland 4102, Australia
- 118 <sup>53</sup>Molecular Cancer Epidemiology Laboratory, QIMR Berghofer Institute of
- 119 Medical Research, Brisbane, Australia
- 120 <sup>54</sup>Department of Genetics, Portuguese Oncology Institute of Porto (IPO-Porto),

121 4200-072 Porto, Portugal  
122 <sup>55</sup>Biomedical Sciences Institute (ICBAS), University of Porto, 4050-313 Porto,  
123 Portugal  
124 <sup>56</sup>Cancer Genetics Group, IPO-Porto Research Center (CI-IPOP), Portuguese  
125 Oncology Institute of Porto (IPO-Porto), Porto, Portugal  
126 <sup>57</sup>The University of Surrey, Guildford, Surrey, GU2 7XH, UK  
127 <sup>58</sup>Center for Cancer Research and Cell Biology, Queen's University of Belfast,  
128 Belfast, UK  
129 <sup>59</sup>Nuffield Department of Surgical Sciences, John Radcliffe Hospital, University of  
130 Oxford, Oxford, UK  
131 <sup>60</sup>NORMENT, KG Jebsen Centre, Oslo University Hospital and University of  
132 Oslo, Oslo, Norway  
133 <sup>61</sup>Department of Radiology, University of California San Diego, La Jolla, CA, USA  
134 <sup>62</sup>Department of Cognitive Science, University of California San Diego, La Jolla,  
135 CA, USA  
136 <sup>63</sup>Department of Neurosciences, University of California San Diego, La Jolla, CA,  
137 USA

138

139

140 \*Corresponding Author:

141 E-mail: [rakarunamuni@ucsd.edu](mailto:rakarunamuni@ucsd.edu)(RK), [tseibert@ucsd.edu](mailto:tseibert@ucsd.edu)(TM)

142

143 ^ Membership of The PRACTIAL Consortium is provided in the Supporting

144 Information.

145

146 **Abstract**

147 We aimed to determine the effect of sample size on performance of polygenic  
148 hazard score (PHS) models in predicting the age at onset of prostate cancer.  
149 Age and genotypes were obtained for 40,861 men from the PRACTICAL  
150 consortium. The dataset included 201,590 SNPs per subject, and was split into  
151 training (34,444 samples) and testing (6,417 samples) sets. Two PHS model-  
152 building strategies were investigated. Established-SNP model considered 65  
153 SNPs that had been associated with prostate cancer in the literature. A stepwise  
154 SNP selection was used to develop Discovery-SNP models. The performance of  
155 each PHS model was calculated for random sizes of the training set (1 to 30  
156 thousand). The performance of a representative Established-SNP model was  
157 estimated for random sizes of the testing set (0.5 to 6 thousand). Mean  $HR_{98/50}$   
158 (hazard ratio of top 2% to the average in the test set) of the Established-SNP  
159 model increased from 1.73[95%CI: 1.69-1.77] to 2.41[2.40-2.43] when the  
160 number of training samples was increased from 1 to 30 thousand. The  
161 corresponding  $HR_{98/50}$  of the Discovery-SNP model increased from 1.05[0.93-  
162 1.18] to 2.19[2.16-2.23].  $HR_{98/50}$  of a representative Established-SNP model using  
163 testing set sample sizes of 0.6 and 6 thousand observations were 1.78[1.70-1.85]  
164 and 1.73[1.71-1.76], respectively. We estimate that a study population of 20 to 30  
165 thousand men is required to develop Discovery-SNP PHS models for prostate  
166 cancer. The required sample size could be reduced to 10 thousand samples, if a  
167 set of SNPs associated with the disease has already been established.

168

169 **Author summary**

170 Polygenic hazard scores represent a recent advancement in polygenic prediction  
171 to model the age of onset of various diseases, such as Alzheimer's disease or  
172 prostate cancer. These scores accumulate small effect sizes from several tens of  
173 genetic variants and can be used to establish an individual's risk of experiencing  
174 an event relative to a control population across time. The largest barrier to the  
175 development of polygenic hazard scores is the large number of study subjects  
176 needed to develop the underlying models. We sought to understand the effect of  
177 varying the total number of samples on the performance of a polygenic hazard  
178 score in the context of prostate cancer. We found that the performance of the  
179 score did not appreciably change beyond 20 to 30 thousand observations when  
180 developing the model from scratch. However, when the discovery of the genetic  
181 variants can be borrowed from those already identified in the literature to be  
182 associated with the disease, the required number of samples is reduced to 10  
183 thousand with no appreciable detriment in performance. We hope that these  
184 results can guide the design of future studies of polygenic scores in other  
185 diseases and demonstrate the importance of genome-wide association studies.

## 186 **Introduction**

187 Polygenic prediction models have been studied extensively for several  
188 diseases such as prostate cancer[1], breast cancer[2], type 2 diabetes[3],  
189 dementia[4], and atherosclerosis[5]. Polygenic scores in the context of survival  
190 models are a more recent advancement in the field, but have been garnering  
191 interest in the prediction of age at onset of Alzheimer's disease[6] and prostate  
192 cancer[7]. The steady increase in genetic testing[8,9], both in public and clinical  
193 domains, suggests that survival models could be applied to new diseases. The  
194 largest obstacle to the development of these models is the large number of study  
195 subjects, often in the tens of thousands[8], which are required for robust training  
196 and testing.

197 Our aim was to quantify the effect of sample size on the performance of a  
198 polygenic survival model. This was explored through a specific disease condition  
199 that is expected to be representative, namely the prediction of age of onset in  
200 prostate cancer. We investigated two potential model development strategies.  
201 For the 'Established-SNP' model, we selected single-nucleotide polymorphisms  
202 (SNPs) that had previously been shown to be associated with prostate cancer,  
203 and simply estimated the coefficients for these SNPs in a Cox proportional  
204 hazards framework. For the 'Discovery-SNP' model, we implemented the SNP  
205 selection technique described by Seibert *et al.*[7] to identify SNPs in our  
206 genotyping data for inclusion in the Cox proportional hazards framework. The  
207 Established-SNP and Discovery-SNP represent two strategies that researchers  
208 could employ to build a polygenic survival model. In order to simulate samples of

209 different sizes, we randomly sampled our training and testing sets. The results of  
210 this work will help inform the design of future studies to develop polygenic  
211 survival models for other diseases.

212

## 213 **Results**

### 214 Established- vs. Discovery-SNP model performance

215 Histogram comparisons of performance metrics of Established (EST) and  
216 Discovery (DIS) SNP models are illustrated in Figure 1. The performance metrics  
217 are shown for 50 random samplings of the training set using a sample size of 30  
218 thousand total observations. Qualitatively, there appears to be more variability in  
219 performance metrics associated with the Discovery process.

220

### 221 Coefficients of Established-SNP model

222 The mean coefficients for the 65 SNPs used in the Established-SNP  
223 model are plotted in Figure 2.

224

### 225 Effect of training set sample size on performance

226 Box plots of the performance metrics of the Established-SNP and  
227 Discovery-SNP models for random samples of the training set are shown in  
228 Figure 3 and Figure 4, respectively. The mean values of  $HR_{98/50}$ ,  $HR_{20/50}$ ,  $HR_{98/20}$ ,  
229  $HR_{80/20}$ , z-score, and beta using a random training sample of 1 thousand total  
230 observations in the Established-SNP model were 1.73 [95% CI: 1.69-1.76], 0.71  
231 [0.71-0.73], 2.42 [2.35-2.50], 1.96 [1.92-2.01], 9.92 [9.57-10.28], and 0.45 [0.43-



232 0.47] respectively. The corresponding values using a random training sample of  
233 30 thousand total observations were 2.41 [95% CI: 2.40-2.43], 0.60 [0.60-0.60],  
234 4.04 [4.02-4.07], 2.86 [2.84-2.87], 15.1 [15.04-15.16], and 1.18 [1.17-1.18]  
235 respectively.

236 The mean values of  $HR_{98/50}$ ,  $HR_{20/50}$ ,  $HR_{98/20}$ ,  $HR_{80/20}$ , z-score, and beta  
237 using a random training sample of 1 thousand total observations in the  
238 Discovery-SNP model were 1.05 [0.93-1.18], 0.98 [0.89-1.07], 1.07 [0.91-1.24],  
239 1.08 [0.91-1.24], 1.06 [-1.20-3.31], and 0.17 [-0.23-0.65] respectively. The  
240 corresponding performance values using a training sample size of 30 thousand  
241 observations were 2.20 [2.16-2.23], 1.60 [1.59-1.62], 3.47 [3.39-3.56], 2.53 [2.49-  
242 2.58], 13.19 [12.96-13.41], and 0.87 [0.85-0.89] respectively.

243

#### 244 Effect of testing set sample size on performance

245 Box plots of the performance metrics of the representative Established-  
246 SNP model for random samples of the testing set are shown in Figure 5. The  
247 mean values of  $HR_{98/50}$ ,  $HR_{20/50}$ ,  $HR_{98/20}$ ,  $HR_{80/20}$ , z-score, and beta using a  
248 random testing sample of 0.5 thousand total observations in the representative  
249 Established-SNP model were 1.78 [1.71-1.85], 0.73 [0.71-0.74], 2.50 [2.33-2.66],  
250 1.99 [1.89-2.09], 3.82 [3.57-4.08], and 0.76 [0.70-0.82] respectively. The  
251 corresponding values using a testing sample of 6 thousand observations were:  
252 1.73 [1.72-1.76], 0.73 [0.72-0.73], 2.39 [2.34-2.44], 1.93 [1.90-1.96], 13.07  
253 [12.80-13.32], and 0.74 [0.72-0.76] respectively.

254

## 255 **Discussion**

256 We identified several trends in the effect of training and testing sample  
257 size on the performance of PHS models in predicting the age of onset of prostate  
258 cancer using SNP genetic variants. When using SNPs that had already been  
259 associated with prostate cancer risk, our analysis suggests that very little  
260 improvement in performance can be achieved once the training sets becomes  
261 larger than 10 to 15 thousand observations. When attempting to discover SNPs,  
262 a similar plateau in performance was observed from training sets larger than 20  
263 to 25 thousand observations. Apart from z-scores, the performance metrics of the  
264 chosen Cox proportional hazards model did not vary with testing sample size.  
265 However, we did observe that the distribution of performance metrics narrows  
266 until a testing sample size of 3 to 4 thousand observations, after which the  
267 distribution remains relatively stable.

268 Our results may be used to inform researchers on the approximate number of  
269 subjects needed to develop PHS models to predict the age of onset of diseases  
270 using SNP counts. A dataset of 20 thousand observations may be the minimum  
271 needed to accurately estimate the PHS coefficients of SNPs that have been  
272 previously discovered in the setting of a logistic model. Such a dataset would  
273 allow for the accurate estimation of SNP coefficients as well as the testing of  
274 model performance in an independent holdout set. Based on our results, this  
275 number would have to be increased to roughly 30 thousand observations if the  
276 researchers intend on discovering the SNPs from scratch using the approach  
277 described here.

278           The PHS model developed by Desikan *et al.*[6] to predict age-associated  
279 risk of Alzheimer's disease used a training set with roughly 55,000 individuals. A  
280 similarly structured model developed by Seibert *et al.*[7] to guide screening for  
281 aggressive prostate cancer was developed with roughly 31,000 men. Studies  
282 such as these require large investments in time, money, and resources in order  
283 to acquire the genetic data needed for the analysis. The results of our analysis  
284 help elucidate that the minimum sample size needed to translate this technology  
285 to other diseases and processes may be lower than what has been used so far in  
286 previous studies. This seems to be particularly true if the researchers use SNPs  
287 that have already been discovered and validated as associated with the process  
288 of interest.

289           The results of this study must be considered in the context of its  
290 limitations. The list of Established-SNPs was previously selected from a larger  
291 dataset that included the sample patients used in the test set in the present  
292 study. As such, there is leakage of information from the test set to the  
293 development of the Established-SNP model. Therefore, the performance metrics  
294 of the Established-SNP model should not be directly compared to those of the  
295 Discovery-SNP model, as the values of the former may be inflated.

296           In addition, we have chosen to focus on only two of countless possible  
297 model development schemes. The role of sample size in other development  
298 strategies—such as regularized Cox proportional models, parametric survival  
299 functions, or random survival forests—is yet to be explored. Finally, the analysis  
300 is limited to prostate cancer and to the SNPs on the iCOGS array. Future work

301 will include SNPs imputed from 1000 Genomes[13]. Such an analysis was not  
302 performed for this first study to limit computation time for bootstrap analyses and  
303 to avoid uncertainty due to imputation.

304 In conclusion, we have studied the effect of sample size on the  
305 performance of PHS models to study the association between SNPs and the age  
306 at onset of prostate cancer. We have determined that models require roughly 20  
307 to 30 thousand samples before their performance would not be improved greatly  
308 by expansion of the training set. Using SNPs that have already been established  
309 in the literature may help reduce the number of training samples required to  
310 reach this performance plateau by almost 10 thousand samples.

311

## 312 **Materials and Methods**

### 313 Training and testing set

314 As previously described[7], we obtained genotype and age data from 21  
315 studies included in the Prostate Cancer Association Group to Investigate Cancer  
316 Associated Alterations in the Genome (PRACTICAL) consortium. We analyzed  
317 data from 40,861 men consisting of 20,551 individuals with prostate cancer and  
318 20,310 individuals without. For analysis, the age for each man was recorded as  
319 either their age at prostate cancer diagnosis (cases) or at interview (controls).  
320 Genotype data for 201,590 SNPs were also available for analysis. The genotype  
321 data had been assayed using a custom iCOGS chip (Illumina, San Diego, CA)  
322 the details for which are elaborated elsewhere[10]. The sample was split into  
323 training (34,444 men) and testing (6,417 men) sets. The testing set was selected

324 using men who were enrolled in the Prostate testing for cancer and Treatment  
325 ( ProtecT[11]) trial. ProtecT (ClinicalTrials.gov: NCT02044172) is a large,  
326 multicenter trial within the United Kingdom which aims to investigate the  
327 effectiveness of treatments for localized prostate cancer. The ProtecT study  
328 group was chosen for testing as it represented a well-characterized group of  
329 individuals that had been used for measuring testing performance for our earlier  
330 work. The Data Availability Statement describing how readers can gain access to  
331 the PRACTICAL dataset is provided in the Supplementary Information.

332

### 333 Established-SNP model

334 A list of 65 SNPs[12] was chosen to represent those on the iCOGS array  
335 that had been published as associated with prostate cancer. The coefficients of  
336 the SNPs within the Established-SNP model were then estimated using the  
337 “coxphfit” function in MATLAB (Mathworks, Natwick, MA). Prior to parameter  
338 estimation, missing SNP data were replaced by mean imputation. It should be  
339 noted that the 65 SNPs used were discovered, in large part, using the data  
340 presently defined as the test set. The effect allele for all 65 SNPs was defined as  
341 “A” to simplify analysis.

342

### 343 Discovery-SNP model

344 SNPs with call rates less than 95% were removed from the selection  
345 process. For every SNP, a trend test was used to check for associations between  
346 SNP count and the binary classification of individuals with or without prostate

347 cancer. The SNP selection pool was then reduced to those whose trend test p-  
348 value was less  $1 \times 10^{-6}$ . In order of increasing p-value, each SNP was tested in a  
349 multiple logistic regression model for association with the binary classification of  
350 men as with or without prostate cancer, after adjusting for age, six principal  
351 components based upon genetic ancestry, and previously selected SNPs. If the  
352 p-value of the coefficient of the tested SNP was less than  $1 \times 10^{-6}$ , it was selected  
353 for the final Cox proportional hazard model estimation. The coefficients of the  
354 selected SNP pool within the Discovery-SNP model were estimated as previously  
355 described[7].

356

### 357 Polygenic Hazard Score (PHS)

358 The polygenic hazard score (PHS) for each of the Established-SNP and  
359 Discovery-SNP models was calculated as the linear product of the coefficients of  
360 the SNPs used in the model and the corresponding patient genotype counts[6,7].

361

### 362 PHS performance metrics

363 Several performance metrics for PHS models were investigated, and are  
364 described in Table 1. In each case, the PHS for each test subject was calculated  
365 as the dot product of SNP coefficients, either Established or Discovery, and SNP  
366 counts. A Cox proportional hazards model was then fit using PHS as the sole  
367 predictor of age in the test set. The z-score and beta of this Cox proportional  
368 hazards model relate to how well PHS was associated with age within the test  
369 set. The hazard ratios were calculated as the exponential of the differences in

370 predicted log-relative hazards of different groups within the test set. The groups  
371 were defined using centile cut-points for those controls within the training set  
372 whose age was less than 70 years. This list of performance metrics expands on  
373 those (z-score and  $HR_{98/50}$ ) that were used in our earlier work[7].

374

375 **Table 1.** Performance metrics used in the evaluation of polygenic hazard scores.

| Performance metric | Description                                                                                                  |
|--------------------|--------------------------------------------------------------------------------------------------------------|
| $HR_{98/50}$       | Hazard ratio of the top 2% to the average (30 – 70%) in the test set                                         |
| $HR_{20/50}$       | Hazard ratio of the bottom 20% to the average (30 – 70%) in the test set                                     |
| $HR_{98/20}$       | Hazard ratio of the top 2% to the bottom 20% in the test set                                                 |
| $HR_{80/20}$       | Hazard ratio of the top 20% to the bottom 20% in the test set.                                               |
| z-score            | z-score of Cox proportional hazards model using PHS as a sole predictor of age in the test set               |
| beta               | coefficient of PHS in a Cox proportional hazards model using PHS as a sole predictor of age in the test set. |

376

377 Random sampling of training set

378           Random sampling of the training set was performed with replacement  
379 while ensuring equal proportions of men with and without prostate cancer. The  
380 training set was randomly sampled to include 1, 5, 10, 15, 20, 25, and 30  
381 thousand total observations. Performance of the Established and Discovery-SNP  
382 models using random samples of the training data was measured in the entire  
383 test set.

384

#### 385 Random sampling of the testing set

386           Random sampling of the testing set was performed with replacement while  
387 ensuring equal proportion of men with and without prostate cancer. The testing  
388 set was randomly sampled to include 0.5, 1, 2, 3, 4, 5 and 6 thousand total  
389 observations. Performance in the randomly sampled testing sets was performed  
390 using a representative Established-SNP model. The representative model was  
391 chosen as that whose parameters were estimated using a training sample size of  
392 30 thousand total observations, and whose performance metrics were the  
393 shortest Euclidean distance to the average performance across all Established-  
394 SNP models using a training sample size of 30 thousand.

395

396



397 **References**

- 398 1. Aly M, Wiklund F, Xu J, Isaacs WB, Eklund M, D'Amato M, et al. Polygenic  
399 risk score improves prostate cancer risk prediction: Results from the  
400 Stockholm-1 cohort study. *Eur Urol.* 2011;60: 21–28.  
401 doi:10.1016/j.eururo.2011.01.017
- 402 2. Machiela MJ, Chen C, Chanock SJ, Hunter DJ, Kraft P. Evaluation of  
403 polygenic risk scores for predicting breast and prostate cancer risk. *Genet*  
404 *Epidemiol.* 2011;514: n/a-n/a. doi:10.1002/gepi.20600
- 405 3. Vassy JL, Hivert MF, Porneala B, Dauriz M, Florez JC, Dupuis J, et al.  
406 Polygenic type 2 diabetes prediction at the limit of common variant  
407 detection. *Diabetes.* 2014;63: 2172–2182. doi:10.2337/db13-1663
- 408 4. Marden JR, Walter S, Tchetgen Tchetgen EJ, Kawachi I, Glymour MM.  
409 Validation of a polygenic risk score for dementia in black and white  
410 individuals. *Brain Behav.* 2014;4: 687–697. doi:10.1002/brb3.248
- 411 5. Natarajan P, Young R, Stitzel NO, Padmanabhan S, Baber U, Mehran R,  
412 et al. Polygenic risk score identifies subgroup with higher burden of  
413 atherosclerosis and greater relative benefit from statin therapy in the  
414 primary prevention setting. *Circulation.* 2017;135: 2091–2101.  
415 doi:10.1161/CIRCULATIONAHA.116.024436
- 416 6. Desikan RS, Fan CC, Wang Y, Schork AJ, Cabral HJ, Cupples LA, et al.  
417 Genetic assessment of age-associated Alzheimer disease risk:  
418 Development and validation of a polygenic hazard score. *PLoS Med.*  
419 2017;14: 1–17. doi:10.1371/journal.pmed.1002258

- 420 7. Seibert TM, Fan CC, Wang Y, Zuber V, Karunamuni R, Parsons JK, et al.  
421 Polygenic hazard score to guide screening for aggressive prostate cancer:  
422 Development and validation in large scale cohorts. *BMJ*. 2018;360: 1–7.  
423 doi:10.1136/bmj.j5757
- 424 8. Chatterjee N, Shi J, García-Closas M. Developing and evaluating polygenic  
425 risk prediction models for stratified disease prevention. *Nat Rev Genet*.  
426 Nature Publishing Group; 2016;17: 392–406. doi:10.1038/nrg.2016.27
- 427 9. Torkamani A, Wineinger NE, Topol EJ. The personal and clinical utility of  
428 polygenic risk scores. *Nat Rev Genet*. Springer US; 2018;19: 581–590.  
429 doi:10.1038/s41576-018-0018-x
- 430 10. Eeles RA, Olama AA Al, Benlloch S, Saunders EJ, Leongamornlert DA,  
431 Tymrakiewicz M, et al. Identification of 23 new prostate cancer  
432 susceptibility loci using the iCOGS custom genotyping array. *Nat Genet*.  
433 2013;45: 385–391. doi:10.1038/ng.2560
- 434 11. Lane JA, Donovan JL, Davis M, Walsh E, Dedman D, Down L, et al. Active  
435 monitoring, radical prostatectomy, or radiotherapy for localised prostate  
436 cancer: Study design and diagnostic and baseline results of the ProtecT  
437 randomised phase 3 trial. *Lancet Oncol*. Lane et al. Open Access article  
438 distributed under the terms of CC BY; 2014;15: 1109–1118.  
439 doi:10.1016/S1470-2045(14)70361-4
- 440 12. Szulkin R, Whittington T, Eklund M, Aly M, Eeles RA, Easton D, et al.  
441 Prediction of individual genetic risk to prostate cancer using a polygenic  
442 score. *Prostate*. 2015;75: 1467–1474. doi:10.1002/pros.23037

443 13. Altshuler DL, Durbin RM, Abecasis GR, Bentley DR, Chakravarti A, Clark

444 AG, et al. A map of human genome variation from population-scale

445 sequencing. *Nature*. 2010;467: 1061–1073. doi:10.1038/nature09534

446

447

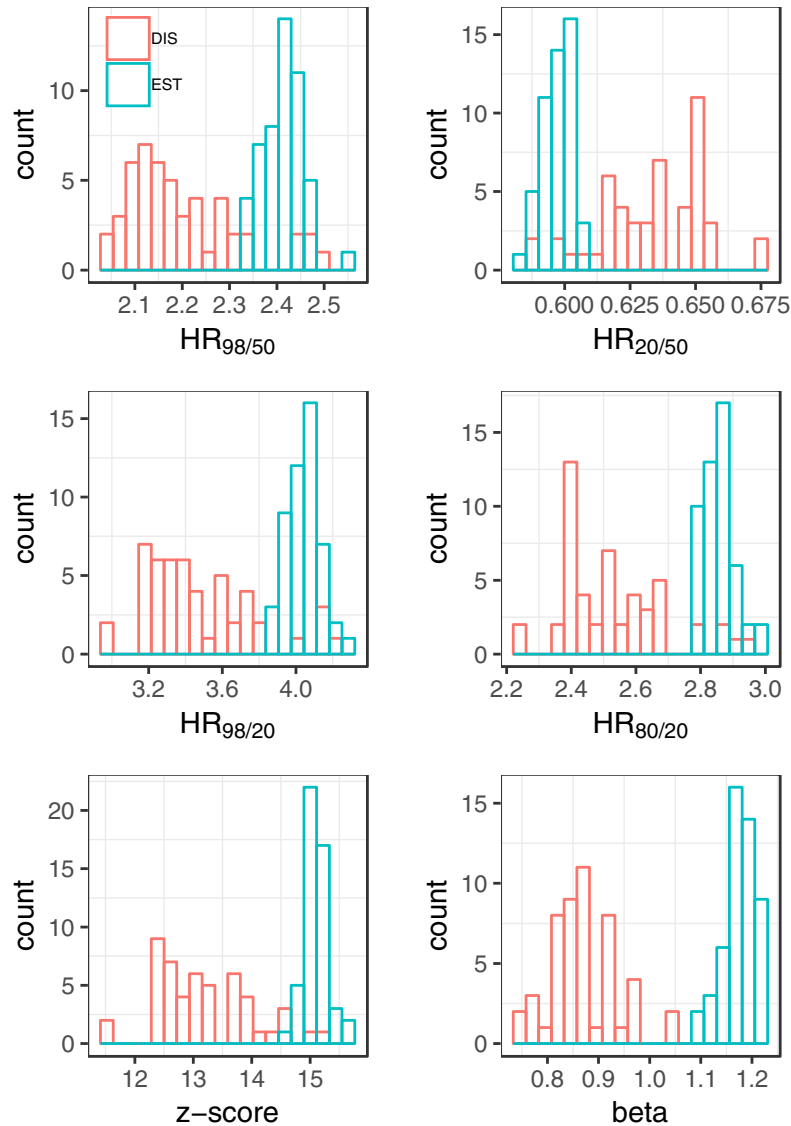

448

449 **Figure 1.** Comparison of performance metrics between Established (EST) and Discovery (DIS)

450 SNP models using 50 random samples of the training set using a sample size of 30 thousand.

451 There is more variability with the Discovery process. Established SNPs, though, were discovered

452 using the data in the training set; this circularity is not accounted for in the present study, which

453 focuses on sample size effects.

454

455

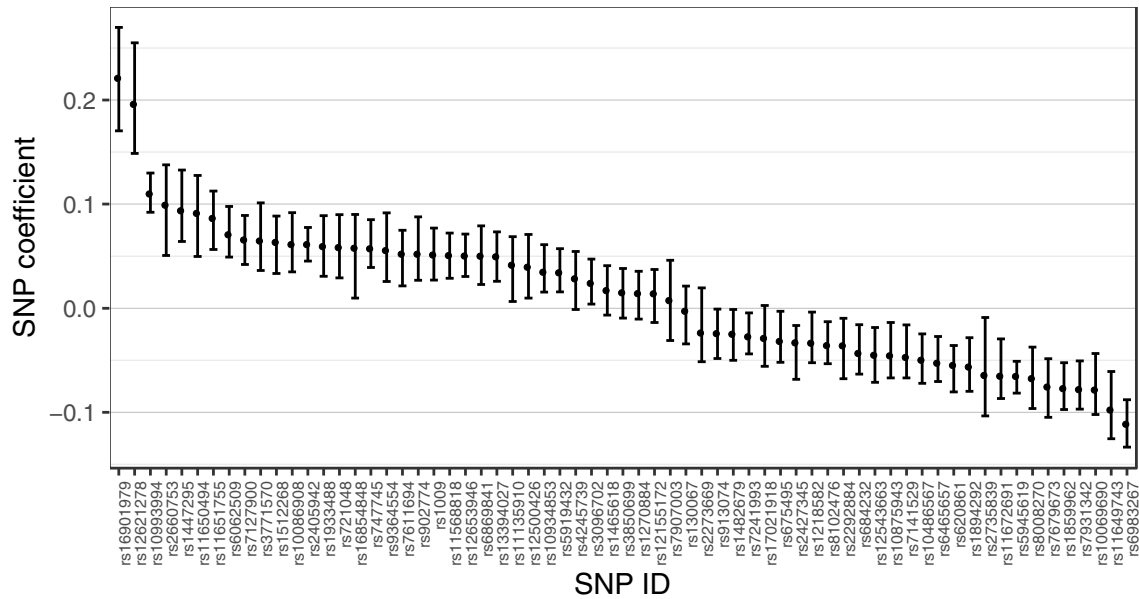

456

457

**Figure 2.** Coefficients of 65 SNPs used in the Established SNP model. Data points represent mean values across 50 iterations of a random sample of the training set using a sample size of 30 thousand total observations. Error bars represent 95% confidence intervals.

459

460

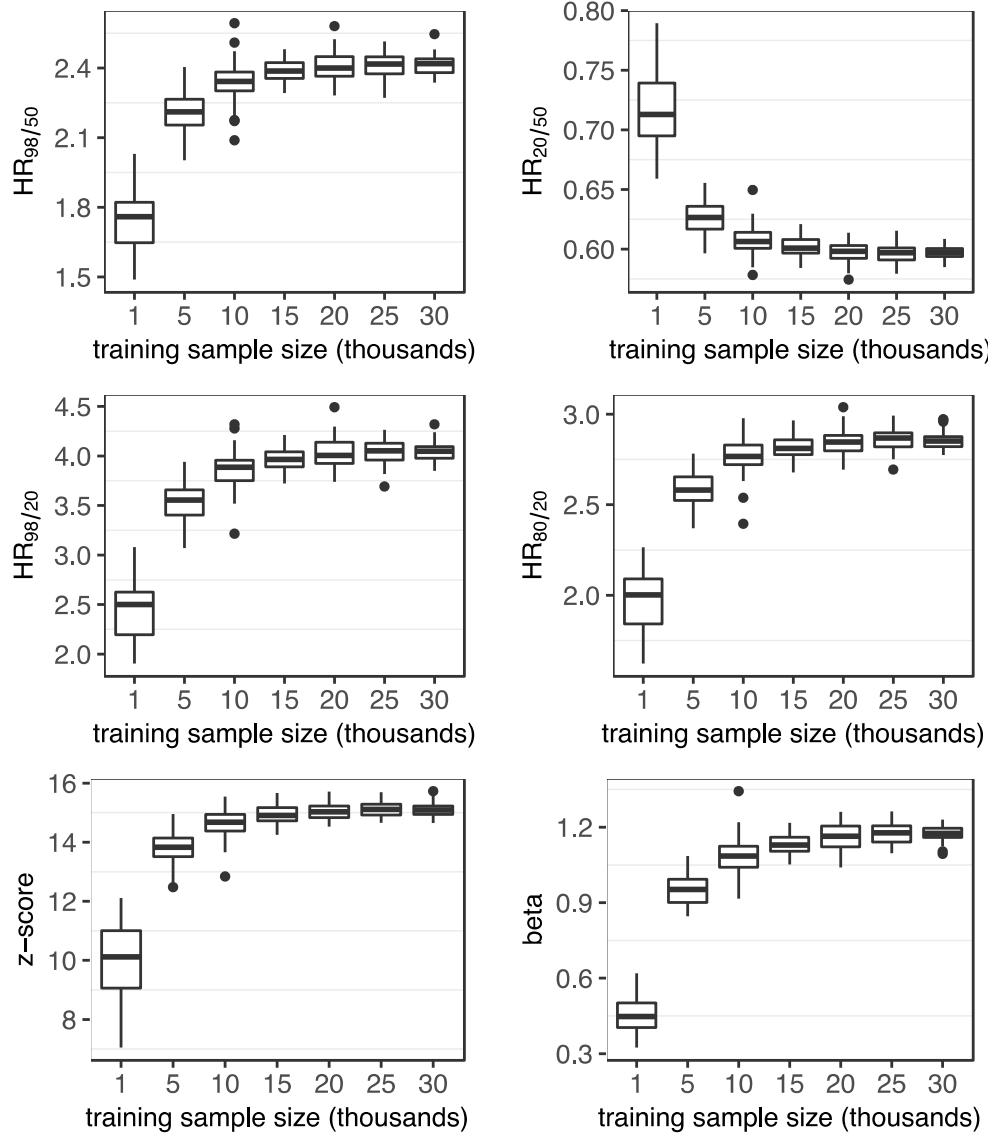

461

462 **Figure 3.** Performance metrics of Established SNP model. Box plots of performance metrics are  
463 shown for random samples of the training set using sample sizes of 1, 5, 10, 15, 20, 25, and 30  
464 thousand total observations. Within each box plot, the horizontal line represents the median and  
465 the box extends from the 25<sup>th</sup> to 75<sup>th</sup> percentile.

466

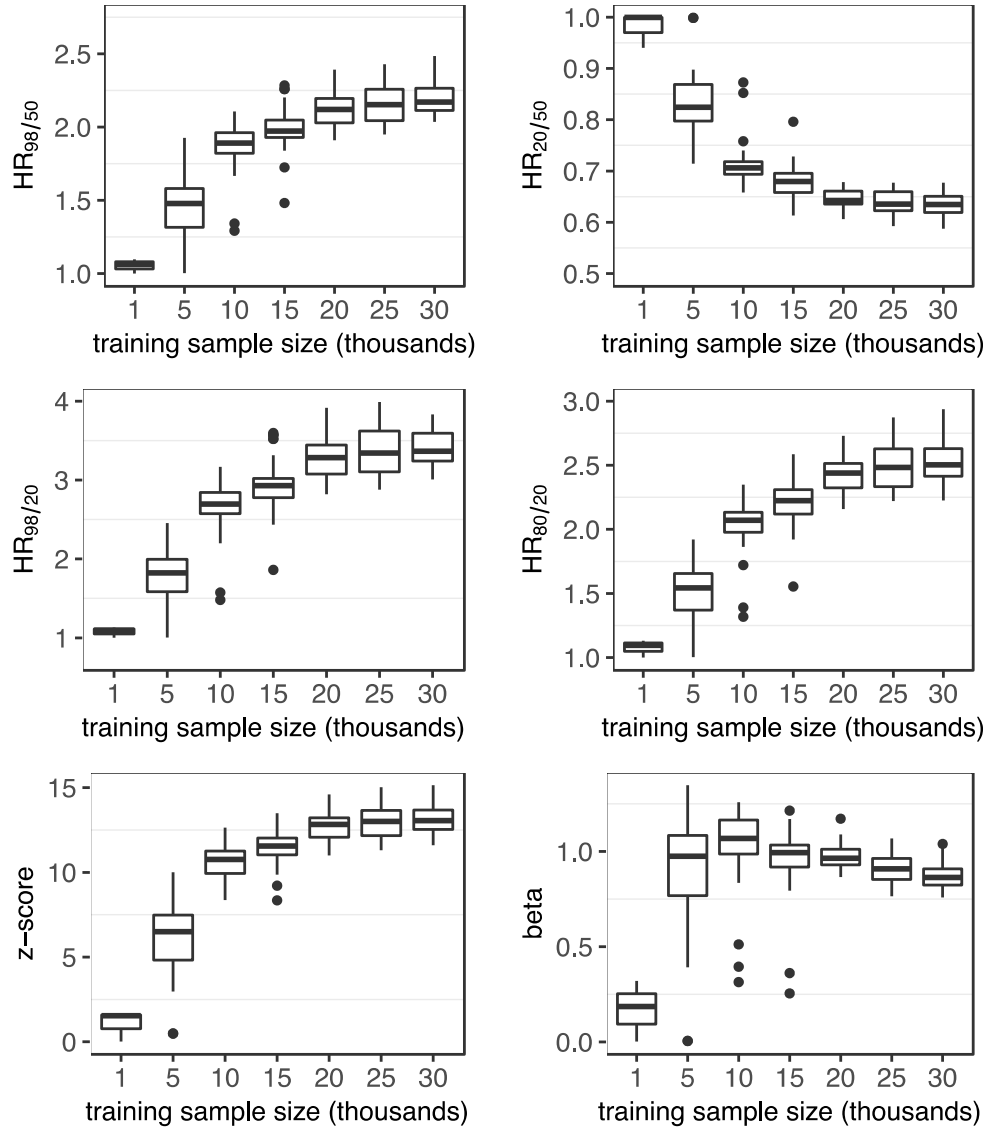

467

468 **Figure 4.** Performance metrics of the Discovery SNP model. Box plots of performance metrics  
469 are shown for random samples of the training set using sample sizes of 1, 5, 10, 15, 20, 25, and  
470 30 thousand total observations. Within each box plot, the horizontal line represents the median  
471 and the box extends from the 25<sup>th</sup> to 75<sup>th</sup> percentile.

472

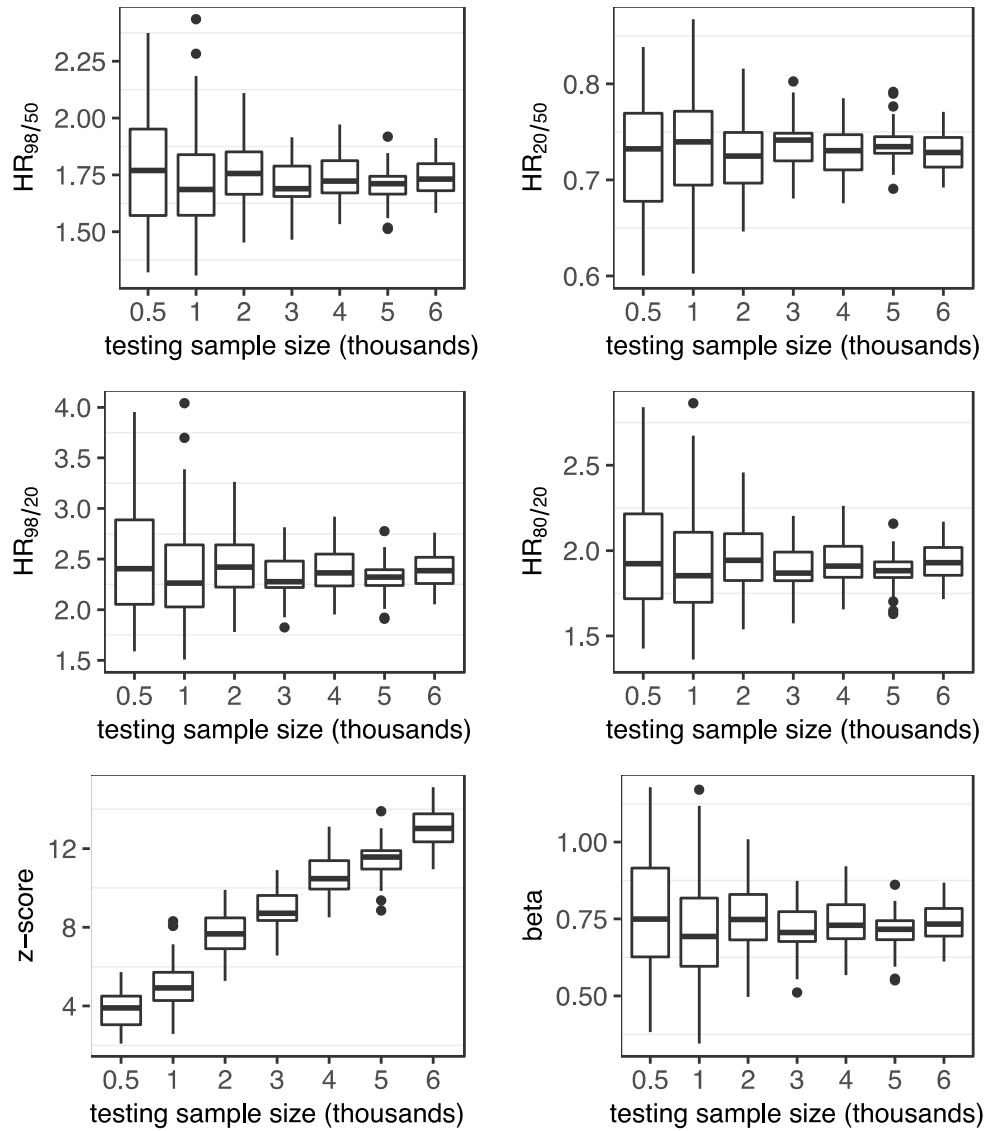

473

474 **Figure 5.** Performance as a function of testing sample size. Box plots of performance metrics of  
475 the representative Established SNP model in random samples of the testing set from 0.5 to 6  
476 thousand total observations.

477



478 **Supporting Information Legends**

479 Supporting Information 1. Data Availability Statement details how readers can  
480 obtain the data from the PRACTICAL (Prostate Cancer Association Group to  
481 Investigate Cancer Associated Alterations in the Genome) consortium. The  
482 document also contains the additional authorship, affiliation, and funding sources  
483 for the PRACTICAL consortium.
